# Supplementary material for: Air Pollution and Percent Emphysema Identified by Computed Tomography in the Multi-Ethnic Study of Atherosclerosis
Source: PubMed Central journal article supplement (PMC4314244; doi:10.1289/ehp.1307951), 2014-10-10
Supplement: ehp.1307951.s001.508.pdf [file ehp.1307951.s001.508.pdf]

**Supplemental Material**

**Air Pollution and Percent Emphysema Identified by Computed  
Tomography in the Multi-Ethnic Study of Atherosclerosis**

Sara D. Adar, Joel D. Kaufman, Ana V. Diez-Roux, Eric A. Hoffman, Jennifer D'Souza, Karen  
D. Hinckley Stukovsky, Stephen S. Rich, Jerome I. Rotter, Xiuqing Guo, Leslie J. Raffel, Paul  
D. Sampson, Assaf P. Oron, Trivellore Raghunathan, and R. Graham Barr

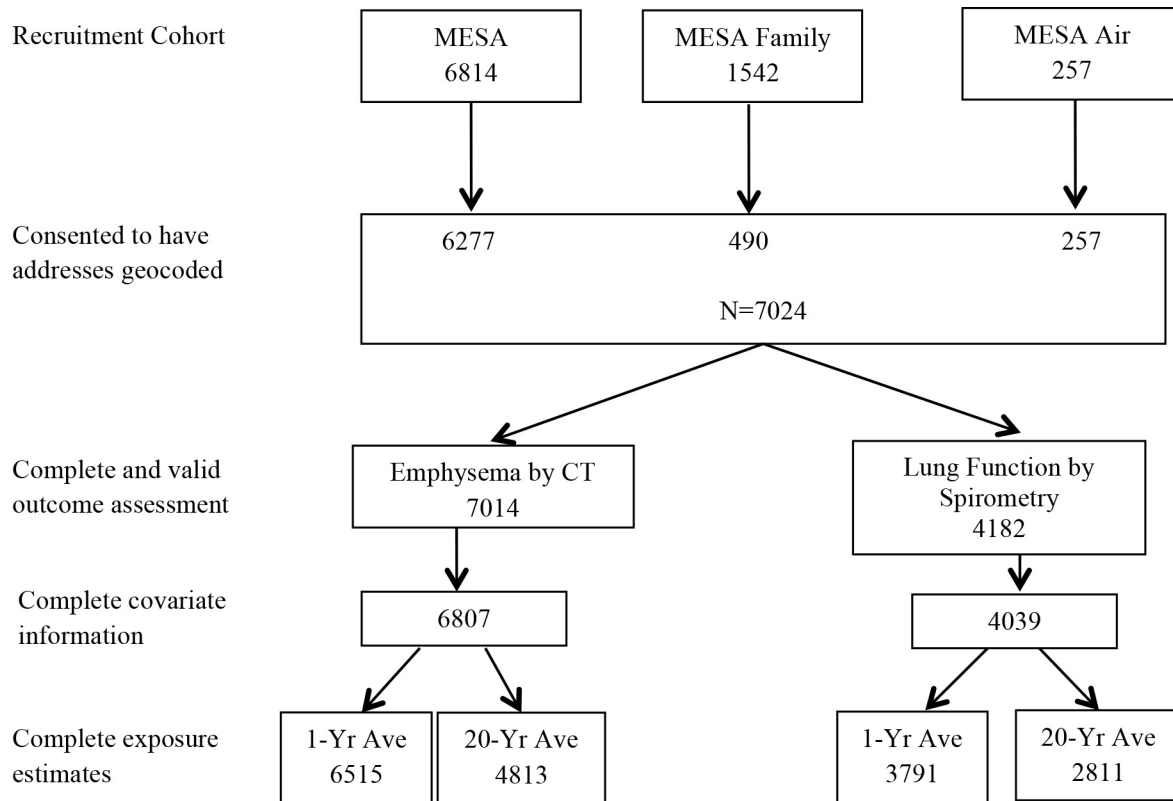

**Figure S1.** Sample size for various endpoints and exposures.

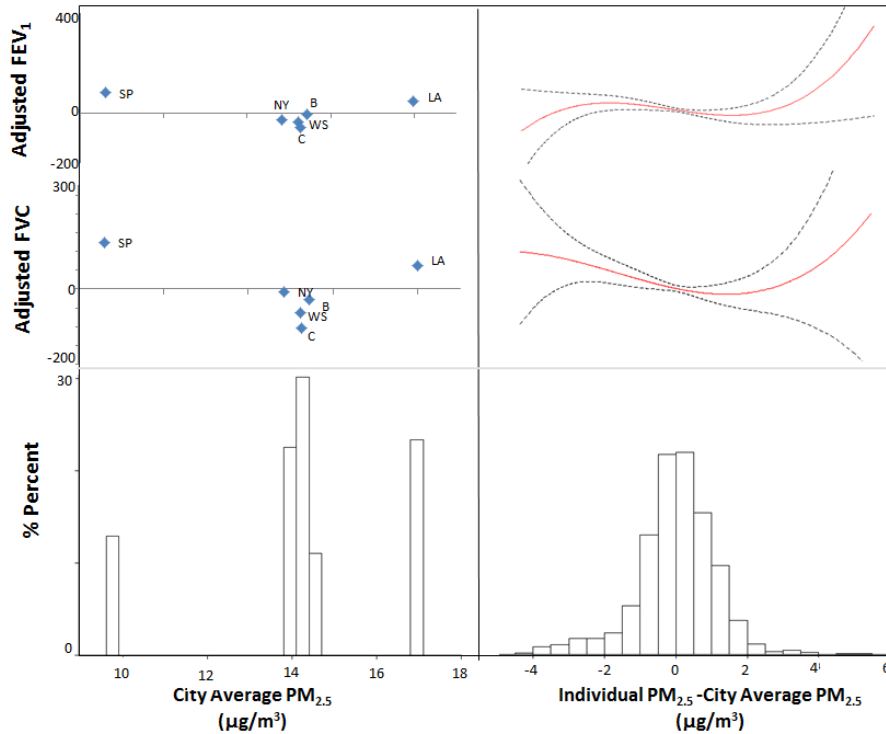

**Figure S2.** Adjusted lung function vs.  $PM_{2.5}$  concentrations expressed as between-site (city average) and within-site (individual concentration - city average) gradients. The left panel illustrates adjusted city mean  $FEV_1$  and  $FVC$  vs. city average  $PM_{2.5}$  concentrations. This reflects the information provided by between-city contrasts. SP=St Paul, B=Baltimore, NY=New York, WS=Winston Salem, C=Chicago, LA=Los Angeles. The right panel illustrates the continuous dose-response relationship (in red, 95% CI in dashed lines) between adjusted  $FEV_1$  and  $FVC$  vs. within-city contrasts in exposures. Overall model included age, race/ethnicity, gender, height, body mass index, education, number of people in household, birth location, smoking information, exam number, detailed smoke exposures, workplace exposures, and history of hay fever. The site-controlled model included an additional fixed effect for study site. In both panels, the bottom of the figure represents a frequency distribution of exposures.

**Table S1.** Differences in percent emphysema by study site compared to the reference group of Los Angeles in fully adjusted models.

| <b>Metropolitan area</b>         | <b>Percent emphysema</b> |
|----------------------------------|--------------------------|
| Winston-Salem, NC                | -0.1 (-3.1, 2.9)         |
| New York City, NY                | -0.6 (-2.2, 1.0)         |
| Baltimore, MD                    | -1.6 (-3.7, 0.6)         |
| St. Paul, MN                     | -7.1 (-9.5, -4.7)        |
| Chicago, IL                      | -0.8 (-2.2, 0.6)         |
| Los Angeles, CA (referent group) | Referent                 |

Note: Overall model included age, race/ethnicity, gender, height, body mass index, education, number of people in household, birth location, smoking information, exam number, detailed smoke exposures, workplace exposures, history of hay fever, and fine particulate air pollution.
